# Supplementary material for: Sedimentary Environment and Model for Organic Matter Enrichment: Chang 7 Shale of Late Triassic Yanchang Formation, Southern Margin of Ordos Basin, China
Source: MDPI journal article supplement (doi:10.3390/en15082948), 2022-04-17
Supplement: s1 [file s1]

## Supplementary Materials

**Annexed Table S1.** The original data of major elements in Chang 7 outcrop shale.

| No. | Stratum              | Al <sub>2</sub> O <sub>3</sub> | Fe <sub>2</sub> O <sub>3</sub> | MgO  | CaO  | Na <sub>2</sub> O | K <sub>2</sub> O | P <sub>2</sub> O <sub>5</sub> | MnO  | TiO <sub>2</sub> | SiO <sub>2</sub> |
|-----|----------------------|--------------------------------|--------------------------------|------|------|-------------------|------------------|-------------------------------|------|------------------|------------------|
| H1  | Chang 7 <sub>2</sub> | 11.32                          | 11.32                          | 1.46 | 2.19 | 0.75              | 1.90             | 0.24                          | 0.09 | 0.43             | 36.42            |
| H2  | Chang 7 <sub>2</sub> | 13.38                          | 10.50                          | 0.87 | 0.98 | 0.95              | 2.25             | 0.29                          | 0.06 | 0.32             | 40.61            |
| H3  | Chang 7 <sub>2</sub> | 10.73                          | 9.50                           | 0.86 | 1.67 | 1.39              | 1.86             | 0.45                          | 0.05 | 0.46             | 46.90            |
| H4  | Chang 7 <sub>3</sub> | 14.20                          | 8.13                           | 1.70 | 1.23 | 1.25              | 2.50             | 0.40                          | 0.20 | 0.51             | 44.44            |
| H5  | Chang 7 <sub>3</sub> | 13.46                          | 7.26                           | 1.78 | 2.11 | 1.34              | 2.25             | 0.40                          | 0.20 | 0.53             | 46.51            |
| H6  | Chang 7 <sub>3</sub> | 15.80                          | 7.62                           | 2.03 | 1.18 | 1.16              | 2.88             | 0.29                          | 0.17 | 0.63             | 48.17            |
| H7  | Chang 7 <sub>3</sub> | 11.50                          | 9.88                           | 1.06 | 1.65 | 1.46              | 2.13             | 0.38                          | 0.12 | 0.40             | 45.36            |
| H8  | Chang 7 <sub>3</sub> | 12.93                          | 9.67                           | 1.15 | 2.60 | 1.45              | 2.05             | 0.40                          | 0.20 | 0.36             | 43.58            |
| H9  | Chang 7 <sub>3</sub> | 13.96                          | 7.85                           | 1.12 | 1.97 | 1.30              | 2.37             | 0.45                          | 0.25 | 0.40             | 46.09            |
| H10 | Chang 7 <sub>3</sub> | 13.54                          | 7.00                           | 0.76 | 0.40 | 0.97              | 3.65             | 0.25                          | 0.10 | 0.30             | 45.73            |
| H11 | Chang 7 <sub>3</sub> | 12.52                          | 8.85                           | 0.97 | 1.62 | 1.43              | 1.50             | 0.34                          | 0.08 | 0.32             | 43.33            |
| H12 | Chang 7 <sub>3</sub> | 12.56                          | 9.63                           | 0.98 | 1.25 | 1.01              | 2.35             | 0.29                          | 0.09 | 0.41             | 44.26            |

**Annexed Table S2.** The original data of trace elements in Chang 7 outcrop shale.

| No. | Stratum              | Cr    | Sr      | Zr     | Ba     | Sc    | V      | Cu     | Zn     | Th    | U     | Co    | Ni    | Nb    | Cd   | Hf   | Ta   | Mo    | B     | Eu   |
|-----|----------------------|-------|---------|--------|--------|-------|--------|--------|--------|-------|-------|-------|-------|-------|------|------|------|-------|-------|------|
| H1  | Chang 7 <sub>2</sub> | 78.65 | 153.20  | 117.80 | 439.40 | 13.40 | 286.40 | 153.60 | 100.70 | 11.90 | 61.80 | 18.20 | 31.10 | 20.00 | 0.88 | 4.14 | 0.50 | 24.90 | 21.00 | 1.23 |
| H2  | Chang 7 <sub>2</sub> | 81.50 | 163.20  | 121.00 | 516.70 | 11.50 | 283.00 | 137.20 | 107.60 | 14.90 | 53.20 | 20.90 | 35.40 | 13.90 | 0.91 | 5.14 | 0.80 | 52.20 | 31.60 | 1.19 |
| H3  | Chang 7 <sub>2</sub> | 62.23 | 230.00  | 136.00 | 462.40 | 13.90 | 235.50 | 144.00 | 116.80 | 10.90 | 62.80 | 16.00 | 30.20 | 9.30  | 0.76 | 4.45 | 0.85 | 76.40 | 15.52 | 1.29 |
| H4  | Chang 7 <sub>3</sub> | 68.50 | 193.50  | 128.10 | 652.20 | 15.90 | 186.30 | 97.00  | 100.70 | 13.90 | 17.50 | 17.00 | 36.50 | 20.00 | 0.61 | 5.85 | 2.13 | 14.30 | 29.50 | 1.28 |
| H5  | Chang 7 <sub>3</sub> | 76.40 | 1824.00 | 134.30 | 610.00 | 15.00 | 180.00 | 96.30  | 95.30  | 12.60 | 21.50 | 18.10 | 36.60 | 19.20 | 0.69 | 5.88 | 1.78 | 28.90 | 42.70 | 1.20 |
| H6  | Chang 7 <sub>3</sub> | 58.12 | 178.50  | 133.20 | 663.20 | 16.10 | 171.20 | 64.70  | 100.00 | 14.40 | 12.90 | 17.10 | 36.70 | 18.80 | 0.64 | 5.59 | 1.50 | 24.90 | 51.00 | 1.39 |
| H7  | Chang 7 <sub>3</sub> | 56.13 | 187.30  | 121.10 | 563.40 | 10.40 | 254.50 | 139.70 | 100.20 | 15.80 | 68.60 | 16.80 | 27.65 | 13.00 | 0.98 | 5.00 | 0.83 | 52.76 | 18.50 | 1.16 |
| H8  | Chang 7 <sub>3</sub> | 71.50 | 435.90  | 127.50 | 766.60 | 17.00 | 300.00 | 141.20 | 116.50 | 9.90  | 51.40 | 17.50 | 29.00 | 6.70  | 1.08 | 3.85 | 0.55 | 58.43 | 20.00 | 1.42 |
| H9  | Chang 7 <sub>3</sub> | 55.30 | 426.30  | 146.00 | 848.50 | 12.10 | 248.30 | 123.70 | 98.40  | 15.40 | 47.50 | 17.40 | 30.00 | 20.30 | 1.14 | 6.00 | 0.68 | 62.20 | 27.60 | 1.84 |
| H10 | Chang 7 <sub>3</sub> | 39.12 | 112.40  | 135.60 | 381.10 | 10.20 | 123.00 | 91.70  | 117.90 | 22.60 | 26.50 | 12.90 | 23.60 | 21.60 | 0.78 | 7.10 | 1.00 | 45.00 | 21.50 | 1.04 |
| H11 | Chang 7 <sub>3</sub> | 57.70 | 385.20  | 133.40 | 775.00 | 14.70 | 306.30 | 142.80 | 122.20 | 9.10  | 59.90 | 14.50 | 25.50 | 7.90  | 0.78 | 4.68 | 0.54 | 76.00 | 14.60 | 1.42 |
| H12 | Chang 7 <sub>3</sub> | 69.40 | 327.90  | 146.80 | 793.00 | 13.50 | 315.00 | 133.80 | 67.80  | 12.50 | 46.00 | 14.60 | 27.00 | 12.60 | 0.92 | 4.82 | 0.83 | 74.00 | 20.00 | 1.46 |
